# Supplementary material for: A novel CRISPR activation mouse enables modelling of aggressive lymphoma and interrogation of venetoclax resistance.
Source: Research Square preprint supplement (doi:10.21203/rs.3.rs-856034/v1), 2021-09-10
Supplement: Supplementary file 2 [file 2cb23fdb87906b576d6c77b0.xlsx]

## Sheet: Sheet1
Symbol	logFC	AveExpr	t	P.Value	FDR	sgRNA
Bcl2a1d	27.7418	10.0975	5.3644	1.57e-07	8.21e-06	CTCCTTCAGAGTCTGAACTT
Bcl2a1d	27.4767	5.7597	5.2289	3.07e-07	8.21e-06	GCAAAGATAGGTCTTGTCAG
Bcl2a1d	26.0717	5.857	4.9522	1.19e-06	2.12e-05	AGCCAAAGTTCAGACTCTGA
Bcl2l1	23.8783	11.6203	4.6212	5.55e-06	7.36e-05	TCCTCCATCGACCAGATCGA
Bcl2l1	23.3249	2.8466	4.4851	1.02e-05	0.0001	GCCGCCCTCGATCTGGTCGA
Bcl2a1a	23.3489	8.136	4.4527	1.18e-05	0.0001	AGCCAAAGTTCAGACTGTGA
Bcl2l1	21.6395	2.356	4.2095	3.34e-05	0.0003	GCCCTCGATCTGGTCGATGG
1700061 G19Rik	21.517	8.4101	4.0732	5.86e-05	0.0004	TATGACCAGAAGGGGACCTT
Mcl1	20.8427	5.7364	3.9815	8.49e-05	0.0005	TTCCGGCCGGAGCGCTCTCG
Nek6	20.1096	11.7675	3.8239	0.0002	0.0008	GACGATCAGGCACCCAGGCT
Sprr2k	19.2756	5.8241	3.6929	0.0003	0.0013	TAAGAAGGACTCCCCCAAAT
Prr22	18.1083	6.2078	3.4471	0.0006	0.0027	TGGGTTCCGGGGGAGGGGGA
Bcl2a1a	18.124	14.3459	3.4384	0.0007	0.0027	CTCCTTCACAGTCTGAACTT
Gm765	17.6416	4.2502	3.3932	0.0008	0.0028	AACTTGCGGCTGAGAGTTGT
Dmxl2	17.5643	2.3251	3.3868	0.0008	0.0028	CGCCGGAGAGCGCGCAAGCG
Ehf	16.563	3.023	3.1506	0.0018	0.0058	CCGGGCAGCCAATCAGAGGA
Kif23	16.559	2.4914	3.1389	0.0019	0.0058	GGCCGTGCCAGCGCTCCCCG
Btbd17	16.165	3.969	3.1089	0.002	0.0059	GACCAGCTTCAACCAATCCA
Obp2a	16.3741	2.4183	3.0932	0.0022	0.0059	CACATCCATCATGGAGCTGA
Hes7	16.0801	4.9046	3.0834	0.0022	0.0059	AGGGTTAGGGGTAGATTGTG
Golt1a	16.0671	5.7147	2.999	0.0029	0.0074	AGCCATTTGTGTGGGGAATG
Ccl8	15.5459	3.2568	2.9087	0.0039	0.0094	TGAGATGATTTCCCGGCAGC
Kcnk13	14.8178	4.3917	2.82	0.0051	0.0116	TAAACAGCGATGCTTCTACC
Defb22	15.0363	4.9029	2.8108	0.0052	0.0116	CAACCATGACCTCAGTCCAT
Dcaf10	14.3913	4.2689	2.7761	0.0058	0.0124	AGCCCTGTGTGTGCAATGTA
Fli1	14.6025	5.4018	2.7225	0.0068	0.0139	GCGAAAAGCAGGGCGAGGAG
Vmn2r57	13.4634	2.864	2.5738	0.0105	0.0206	ATGCCCATCCATAAGACTGA
Chchd5	13.2	2.8768	2.5263	0.012	0.0219	CTCCTCCCGGATAGGCAGTG
Mfsd2a	13.259	3.963	2.5237	0.0121	0.0219	GTAGTTAGGAGCACGCGGTG
Zfp526	13.0624	3.8872	2.5045	0.0128	0.0219	CGCAGACACCAGTGCCCTGG
Irs3	13.0985	2.2699	2.5025	0.0128	0.0219	AAATTCCTGCACTCGGGCGT
Serpinb10	12.926	4.3445	2.4675	0.0141	0.0234	CTGGAAAAGGAAGAGTGTTC
4921517 O11Rik	12.7637	2.914	2.4267	0.0158	0.0247	CTGGCATAGAGGGTGAGTAG
Gm6109	12.6848	3.0901	2.4118	0.0164	0.0247	TCTAAGTTTGAGGACAGATT
Prmt8	12.686	3.7954	2.4079	0.0166	0.0247	CTTCTAACGAGGGCAAGCAC
Slc30a4	12.6247	2.3555	2.4011	0.0169	0.0247	CTCGGCGCGCCCCCAAGCGG
Shmt2	12.7221	3.0117	2.3945	0.0172	0.0247	TTTCCCATCTATACAAGTCC
Btbd35f30	12.474	2.4132	2.3712	0.0183	0.0256	GAAGGGGAAGGAGGAGGGAG
Tal2	12.4043	2.8428	2.343	0.0197	0.0263	CTTGGCTGCTGCACTTGGGA
Evi2a	12.1343	2.2051	2.3408	0.0199	0.0263	ATAAACAATAAGCCATAGGT
5830469 G19Rik	12.2708	3.3409	2.3278	0.0205	0.0266	GTGTCTCGGGCCTGCTCTAA
Psmg2	12.1535	2.5852	2.293	0.0225	0.0284	AGTCCTCGACCTACGCCCCC
Adck5	12.0252	2.8384	2.2807	0.0232	0.0286	CTTGGTAAAGACTCATCACT
Mrpl41	12.0329	3.1637	2.2595	0.0245	0.0295	GCCCAGCCTCAGCCGAGCGG
Btnl1	12.011	3.3725	2.2453	0.0254	0.0298	AGGTCTGGTGGTCAGATTGG
2010315 B03Rik	11.9709	2.9598	2.2387	0.0259	0.0298	TGGCCCAGGTTTCACGACCA
4933409 L14Rik	11.3796	3.5402	2.1705	0.0307	0.0345	TGTCACAATCCATGTTCCCT
	11.3973	4.2952	2.1631	0.0313	0.0345	AGCTTGCCTGTGGGTATGGG
Sdk1	10.723	3.4482	2.0694	0.0393	0.0425	AAAACAAGCGAGCGCCGTGG
